# Supplementary material for: CO2 Methanation: Solvent-Free Synthesis of Nickel-Containing Catalysts from Complexes with Ethylenediamine
Source: MDPI journal article supplement (doi:10.3390/ma16072616), 2023-03-25
Supplement: s1 [file s1]

## SUPPLEMENTARY MATERIAL

### CO<sub>2</sub> methanation: Solvent-Free Synthesis of Nickel -Containing Catalysts from Complexes with Ethylenediamine

Olga V. Netskina <sup>1,\*</sup>, Kirill A. Dmitruk <sup>1,2</sup>, Olga I. Mazina <sup>1</sup>, Alexander A. Paletsky <sup>1,3</sup>, Svetlana A. Mukha <sup>1</sup>, Igor P. Prosvirin <sup>1</sup>, Alena A. Pochtar <sup>1</sup>, Olga A. Bulavchenko <sup>1</sup>, Andrey G. Shmakov <sup>3</sup>, Janna V. Veselovskaya <sup>1,2</sup>, Oxana V. Komova <sup>1</sup>

<sup>1</sup> Boreskov Institute of Catalysis SB RAS, Pr. Akademika Lavrentieva 5, 630090 Novosibirsk, Russia

<sup>2</sup> Novosibirsk State University, 1 Pirogova Str., Novosibirsk, 630090, Russia

<sup>3</sup> Voevodsky Institute of Chemical Kinetics and Combustion SB RAS, 3 Institutskaya Str., 630090 Novosibirsk, Russia

\* Correspondence: netskina@catalysis.ru (O.V.N.); Tel.: +7-383-330-74-58

**Table S1.** The solid-state reaction models [1,2].

| Model                                 |                                      | Differential form $f(\alpha)$                               | Integral form $g(\alpha)$              |
|---------------------------------------|--------------------------------------|-------------------------------------------------------------|----------------------------------------|
| <i>Reaction order model</i>           |                                      |                                                             |                                        |
| 1                                     | Mampel                               | $1 - \alpha$                                                | $-\ln(1 - \alpha)$                     |
| <i>Diffusion models</i>               |                                      |                                                             |                                        |
| 2                                     | 1D Diffusion                         | $(1/2) \cdot \alpha$                                        | $\alpha^2$                             |
| 3                                     | Jander (3D Diffusion)                | $(3/2) \cdot (1 - \alpha)^{2/3} / [1 - (1 - \alpha)^{1/3}]$ | $[1 - (1 - \alpha)^{1/3}]^2$           |
| 4                                     | Ginstling-Brounshtein (3D Diffusion) | $(3/2) / [(1 - \alpha)^{-1/3} - 1]$                         | $1 - (2\alpha/3) - (1 - \alpha)^{2/3}$ |
| <i>Geometrical contraction models</i> |                                      |                                                             |                                        |
| 5                                     | Contracting cylinder                 | $2(1 - \alpha)^{1/2}$                                       | $1 - (1 - \alpha)^{1/2}$               |
| 6                                     | Contracting sphere                   | $3(1 - \alpha)^{2/3}$                                       | $1 - (1 - \alpha)^{1/3}$               |
| <i>Sigmoidal models</i>               |                                      |                                                             |                                        |
| 7                                     |                                      | $2\alpha^{1/2}$                                             | $\alpha^{1/2}$                         |
| 8                                     | Power law                            | $3\alpha^{2/3}$                                             | $\alpha^{1/3}$                         |
| 9                                     |                                      | $4\alpha^{3/4}$                                             | $\alpha^{1/4}$                         |
| 10                                    |                                      | $2(1 - \alpha) \cdot [-\ln(1 - \alpha)]^{1/2}$              | $[-\ln(1 - \alpha)]^{1/2}$             |
| 11                                    | Avrami-Erofeev                       | $3(1 - \alpha) \cdot [-\ln(1 - \alpha)]^{2/3}$              | $[-\ln(1 - \alpha)]^{1/3}$             |
| 12                                    |                                      | $4(1 - \alpha) \cdot [-\ln(1 - \alpha)]^{3/4}$              | $[-\ln(1 - \alpha)]^{1/4}$             |

1. Nyazika, T.; Jimenez, M.; Samyn, F.; Bourbigot, S. Pyrolysis Modeling, Sensitivity Analysis, and Optimization Techniques for Combustible Materials: A Review. *J. Fire Sci.* 2019, 37, 377–433, doi:10.1177/0734904119852740.
2. Khawam, A.; Flanagan, D.R. Solid-State Kinetic Models: Basics and Mathematical Fundamentals. *J. Phys. Chem. B* 2006, 110, 17315–17328, doi:10.1021/jp062746a

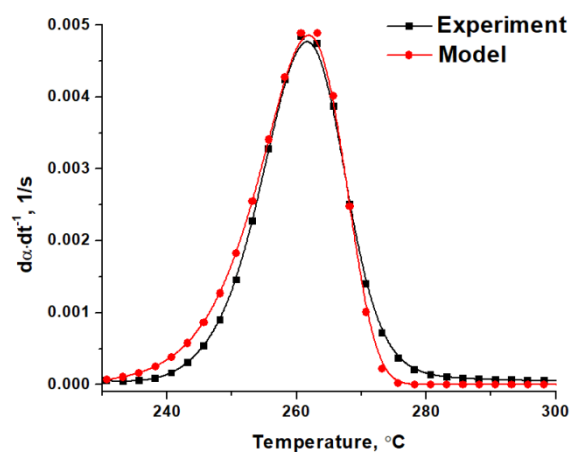

(a)

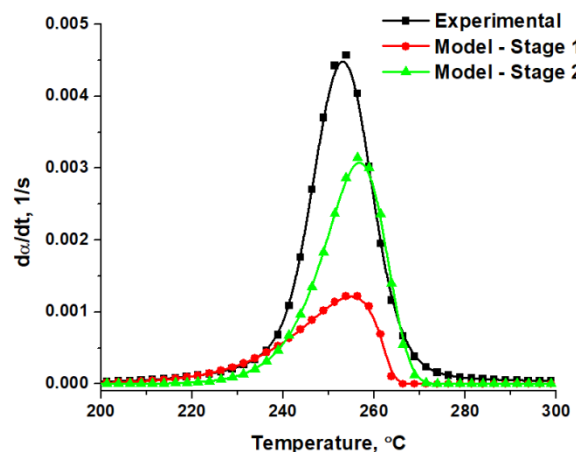

(b)

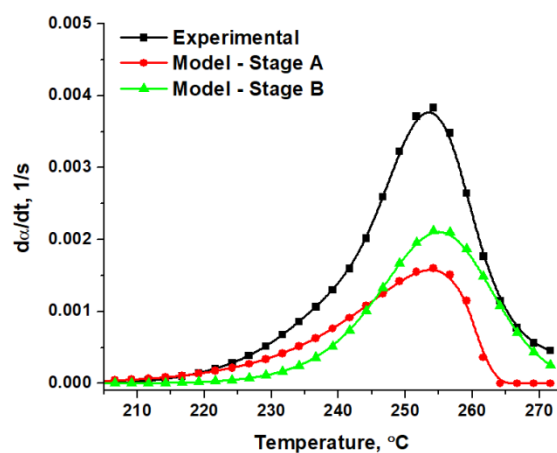

(c)

**Figure S1.** Models of thermal decomposition of (a)  $[\text{Ni}(\text{C}_2\text{H}_8\text{N}_2)_2](\text{NO}_3)_2$ , (b)  $[\text{Ni}(\text{C}_2\text{H}_8\text{N}_2)_3](\text{NO}_3)_2$  and (c)  $[\text{Ni}(\text{C}_2\text{H}_8\text{N}_2)_3](\text{ClO}_4)_2$  complexes in helium with a heating rate of  $5^\circ\text{C}\cdot\text{min}^{-1}$  (5 mg, helium,  $20\text{ mL}\cdot\text{min}^{-1}$ ,  $5^\circ\text{C}\cdot\text{min}^{-1}$ ).

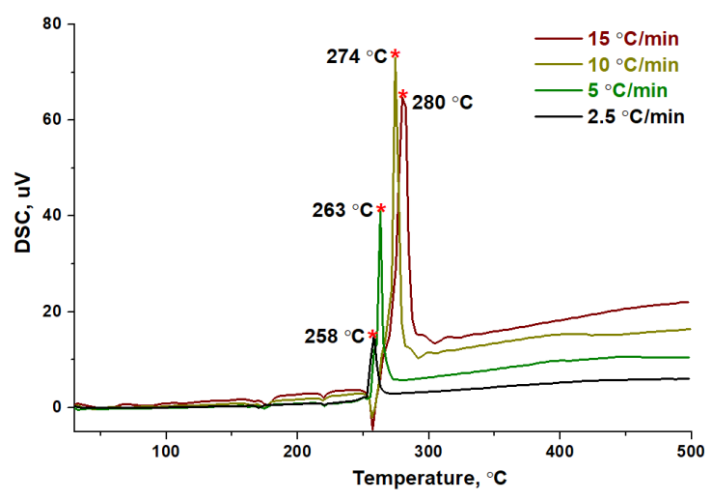

(a)

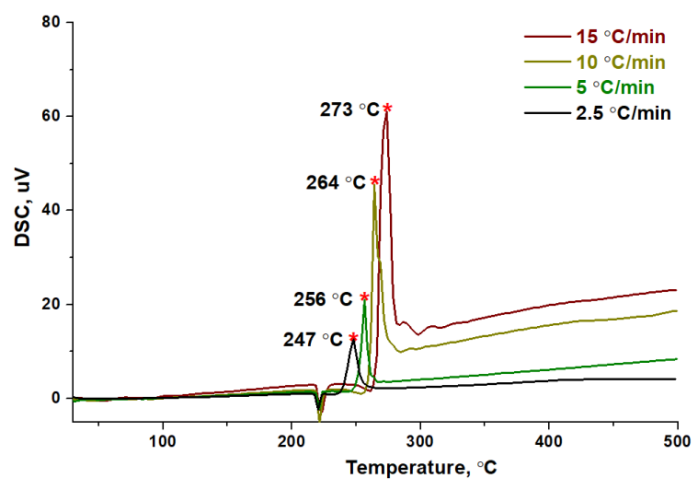

(b)

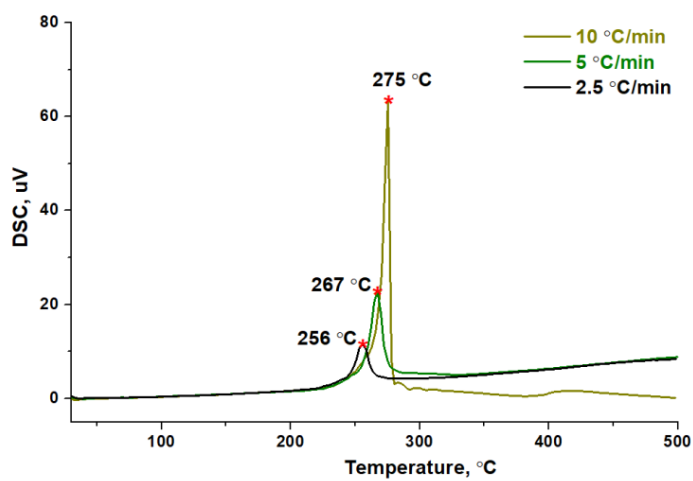

(c)

Figure S2. DSC data for (a)  $[\text{Ni}(\text{C}_2\text{H}_8\text{N}_2)_2](\text{NO}_3)_2$ , (b)  $[\text{Ni}(\text{C}_2\text{H}_8\text{N}_2)_3](\text{NO}_3)_2$  and (c)  $[\text{Ni}(\text{C}_2\text{H}_8\text{N}_2)_3](\text{ClO}_4)_2$  complexes in helium at different heating rates (5 mg, helium, 20 mL·min<sup>-1</sup>).

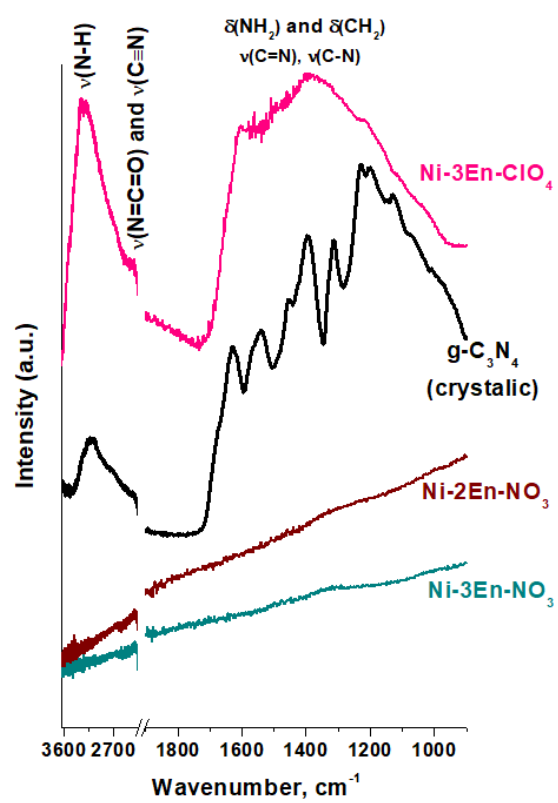

Figure S3. FTIR spectra of Ni-2En-NO<sub>3</sub>, Ni-3En-NO<sub>3</sub>, Ni-3En-ClO<sub>4</sub> and g-C<sub>3</sub>N<sub>4</sub>.

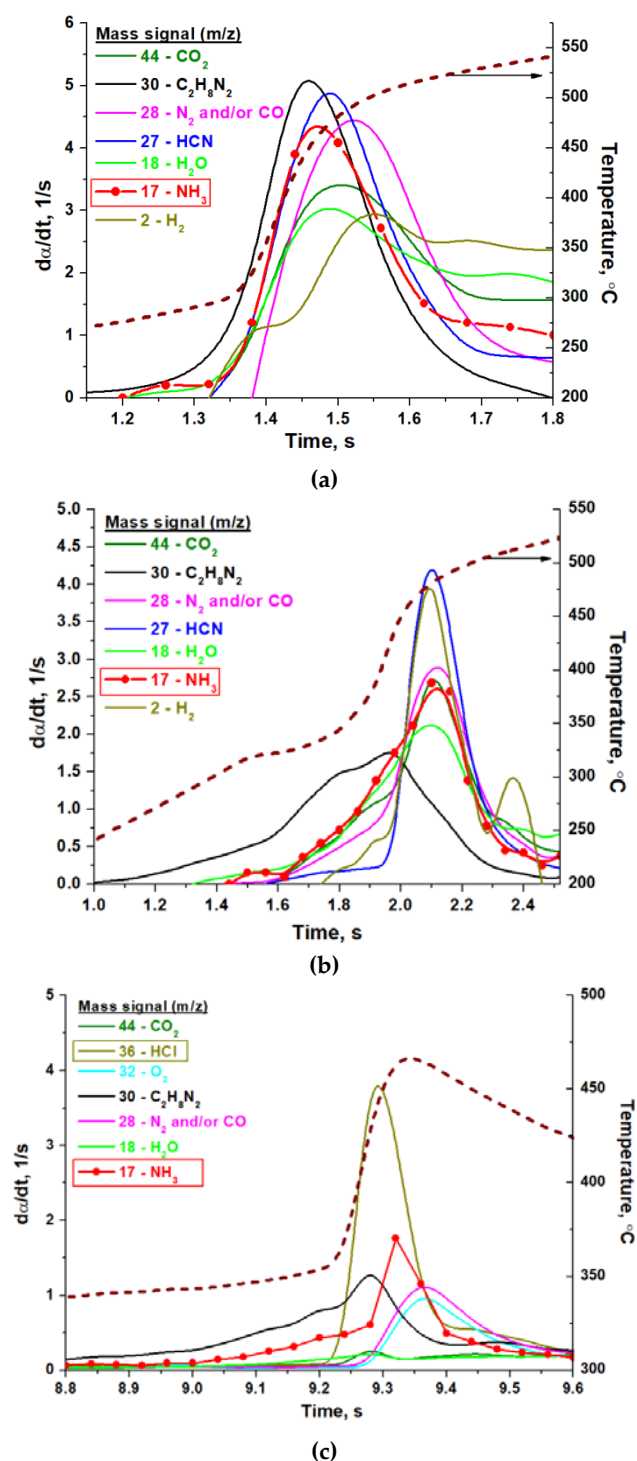

**Figure S4.** Mass spectrometry (DMSTA) of gas released during the thermal decomposition of (a)  $[\text{Ni}(\text{C}_2\text{H}_8\text{N}_2)_2](\text{NO}_3)_2$ , (b)  $[\text{Ni}(\text{C}_2\text{H}_8\text{N}_2)_3](\text{NO}_3)_2$  and (c)  $[\text{Ni}(\text{C}_2\text{H}_8\text{N}_2)_3](\text{ClO}_4)_2$  complexes (5 mg, argon,  $100 \text{ mL} \cdot \text{min}^{-1}$ ).

#### Method description

The composition of gaseous products of combustion was analyzed by the dynamic mass-spectral thermal analysis (DMSTA) method, using a time-of-flight mass spectrometer with a molecular beam sampling system MSCh-4 (Plant Of Scientific Instrumentation, Sumy, USSR) under a flow of Ar ( $5 \text{ mL} \cdot \text{min}^{-1}$ ). Average heating rate was  $\sim 300 \text{ }^\circ\text{C} \cdot \text{s}^{-1}$ . The sample weight was 1-5 mg. The delay between measurements was 0.04 s. The identification of mass spectral signals was carried out using the mass spectra of individual substances from the NIST database.

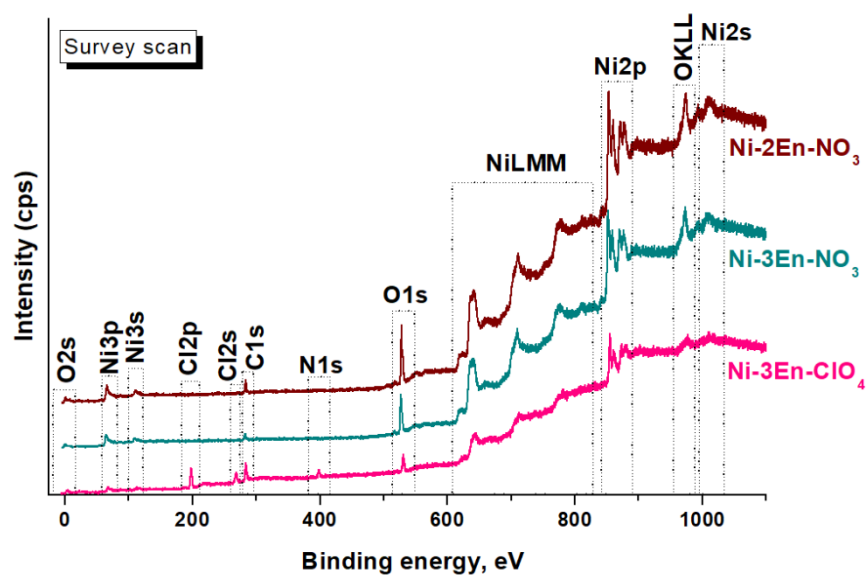

**Figure S5.** XPS survey spectra for Ni-2En-NO<sub>3</sub>, Ni-3En-NO<sub>3</sub>, Ni-3En-ClO<sub>4</sub> samples.

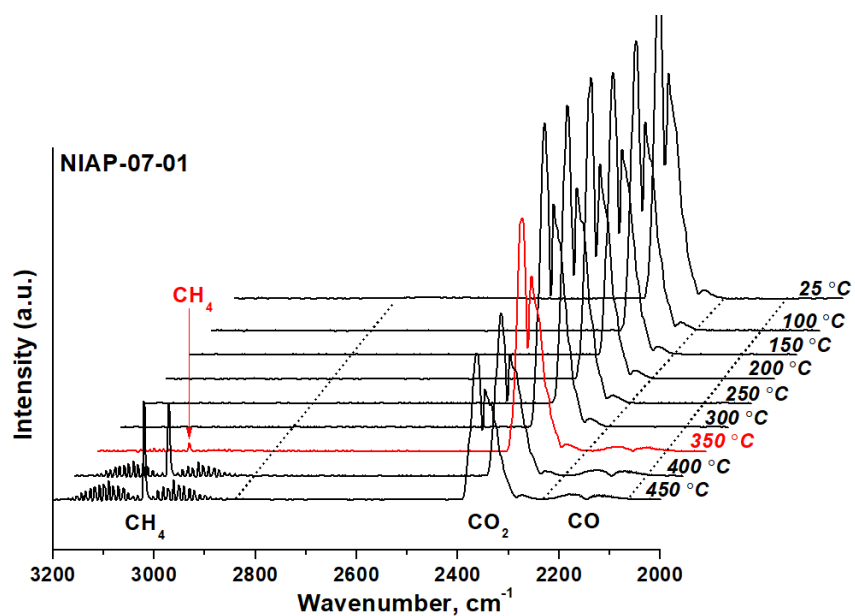

**Figure S6.** FTIR spectra of the gas mixture at the reactor outlet during activation of the industrial NIAP-07-01 catalyst at different temperatures.

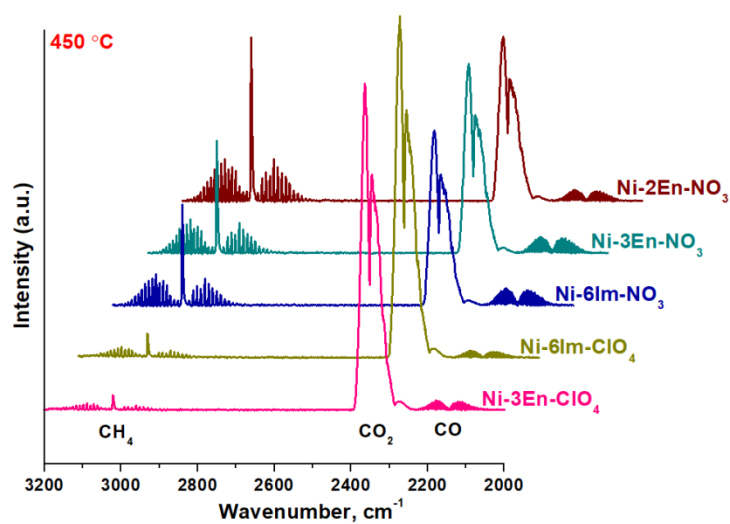

**Figure S7.** FTIR spectra of the gas mixture at the reactor outlet at 450 °C over the samples obtained from complexes: Ni-3En-ClO<sub>4</sub> – tris(ethylenediamine)nickel(II) perchlorate; Ni-6Im-ClO<sub>4</sub> – hexa(imidazole)nickel(II) perchlorate; Ni-6Im-NO<sub>3</sub> – hexa(imidazole)nickel(II) nitrate; Ni-3En-NO<sub>3</sub> – tris(ethylenediamine)nickel(II) nitrate; Ni-2En-NO<sub>3</sub> – bis(ethylenediamine)nickel(II) nitrate.
